# Supplementary material
Source: PubMed Central journal article supplement (PMC3374310)
Supplement: supp_112.139378_FileS1.pdf [file supp_112.139378_FileS1.pdf]

## File S1

### Supporting Materials and Methods

#### Cell Lysates and Protein Complexes Purification

Ypt1, Ypt31 and Ypt32 proteins expressed in bacteria were purified as described previously (Jones *et al.*, 2000); protein concentration was ~0.5 mg/ml. Yeast cell extracts and purified protein complexes were prepared and analyzed as described previously (Morozova *et al.*, 2006). For purifying TRAPP complexes, cells were grown in SD-Ura medium overnight, and then diluted into SD-Ura-Leu media at OD<sub>600</sub> of 0.2 to grow overnight. Cells were re-inoculated into 1L medium at OD<sub>600</sub> of 0.2 to cell OD<sub>600</sub> of 0.8, and then yeast cells expressing GST-Bet5, GST-Trs85, and GST under the CUP1 promoter were induced with 0.25 mM CuSO<sub>4</sub> for 6 h at 26°C. Cell breakage buffers were supplemented with an EDTA-free protease-inhibitors cocktail (Roche Diagnostics). Protein concentrations were determined by a Bio-Rad protein assay (Bio-Rad, Hercules, CA). Ten micrograms of yeast whole cell lysates or 0.2 µg GST-associated complexes were loaded on 10% SDS-polyacrylamide gel electrophoresis (PAGE). Gels were run, and proteins were transferred to polyvinylidene difluoride membranes and subjected to immuno-blot analysis.

#### GDP Release Assays

GDP release assays were performed as described previously (Morozova *et al.*, 2006). GST-, GST-Bet5-, or GST-Trs85-associated complexes were purified from yeast cell lysates and added as a source of GEF to GDP-release assays with bacterially purified Ypt1, Ypt31 or Ypt32 loaded with <sup>3</sup>H-GDP.

#### References

- Brachmann, C.B., Davies, A., Cost, G.J., Caputo, E., Li, J., Hieter, P., and Boeke, J.D. (1998). Designer deletion strains derived from *Saccharomyces cerevisiae* S288C: a useful set of strains and plasmids for PCR-mediated gene disruption and other applications. *Yeast* **14**, 115-132.
- Jones, S., Jedd, G., Kahn, R.A., Franzusoff, A., Bartolini, F., and Segev, N. (1999). Genetic interactions in yeast between Ypt GTPases and Arf guanine nucleotide exchangers. *Genetics* **152**, 1543-1556.
- Jones, S., Newman, C., Liu, F., and Segev, N. (2000). The TRAPP complex is a nucleotide exchanger for Ypt1 and Ypt31/32. *Mol Biol Cell* **11**, 4403-4411.
- Lewis, M.J., Nichols, B.J., Prescianotto-Baschong, C., Riezman, H., and Pelham, H.R.B. (2000). Specific retrieval of the exocytic SNARE Snc1p from early yeast endosomes. *Mol Biol Cell* **11**, 23-38.
- Liang, Y., Morozova, N., Tokarev, A.A., Mulholland, J.W., and Segev, N. (2007). The role of Trs65 in the Ypt/Rab guanine nucleotide exchange factor function of the TRAPP II complex. *Mol Biol Cell* **18**, 2533-2541.
- Ma, H., Kunes, S., Schatz, P.J., and Botstein, D. (1987). Plasmid construction by homologous recombination in yeast. *Gene* **58**, 201-216.
- Michelsen, K., Mrowiec, T., Duderstadt, K.E., Frey, S., Minor, D.L., Mayer, M.P., and Schwappach, B. (2006). A multimeric membrane protein reveals 14-3-3 isoform specificity in forward transport in yeast. *Traffic* **7**, 903-916.
- Morozova, N., Liang, Y., Tokarev, A.A., Chen, S.H., Cox, R., Andrejic, J., Lipatova, Z., Sciorra, V.A., Emr, S.D., and Segev, N. (2006). TRAPP II subunits are required for the specificity switch of a Ypt-Rab GEF. *Nat Cell Biol* **8**, 1263-1269.

- Sciorra, V.A., Audhya, A., Parsons, A.B., Segev, N., Boone, C., and Emr, S.D. (2005). Synthetic genetic array analysis of the PtdIns 4-kinase Pik1p identifies components in a Golgi-specific Ypt31/rab-GTPase signaling pathway. *Mol Biol Cell* *16*, 776-793.
- Sikorski, R.S., and Hieter, P. (1989). A system of shuttle vectors and yeast host strains designed for efficient manipulation of DNA in *Saccharomyces cerevisiae*. *Genetics* *122*, 19-27.
- Yamamoto, K., and Jigami, Y. (2002). Mutation of TRS130, which encodes a component of the TRAPP II complex, activates transcription of OCH1 in *Saccharomyces cerevisiae*. *Curr Genet* *42*, 85-93.
