# Supplementary material
Source: PubMed Central journal article supplement (PMC3374310)
Supplement: supp_112.139378_TableS1.pdf [file supp_112.139378_TableS1.pdf]

**Table S1 Yeast strains and plasmids used in this study**

| <b>A. Strains</b> |                                    |                                                                                                                       |                                  |
|-------------------|------------------------------------|-----------------------------------------------------------------------------------------------------------------------|----------------------------------|
| Strain            | Alias                              | Genotype                                                                                                              | Source*                          |
| NSY825            | BY4741                             | <i>MATa his3-1 leu2Δ met15Δ ura3Δ</i>                                                                                 | (Brachmann <i>et al.</i> , 1998) |
| YLY1342           |                                    | BY4741, <i>TRS65::Hyg</i>                                                                                             |                                  |
| YLY919            |                                    | BY4741, <i>TRS85::Kan</i>                                                                                             |                                  |
| NSY128            | YPT31                              | <i>MATα ade2 his3-Δ200 leu leu2-3,112 lys 2-801 ura 3-52 gal</i>                                                      | (Jones <i>et al.</i> , 1999)     |
| NSY340            | <i>ypt31Δ/32ts</i>                 | <i>MATα ura 3-52 lys2 leu2 ypt31Δ/32ts</i>                                                                            | (Jones <i>et al.</i> , 1999)     |
| NSY991            | VSY459, TRS130                     | <i>MATa leu2-3,112 his3-Δ200 trp1-Δ901 lys2-801 suc2-Δ9 ura3-52 TRS130-HA:HIS3MX6</i>                                 | (Sciorra <i>et al.</i> , 2005)   |
| NSY992            | <i>trs130ts</i>                    | <i>MATa leu2-3,112 his3-Δ200 trp1-Δ901 lys2-801 suc2-Δ9 ura3-52 trs130-(33 aa truncation)-HA<sup>ts</sup>:HIS3MX6</i> | (Sciorra <i>et al.</i> , 2005)   |
| NSY1081           | YPT1                               | <i>MATa ura3-52 Leu2 his3</i>                                                                                         | (Liang <i>et al.</i> , 2007)     |
| NSY1082           | <i>ypt1ts</i>                      | <i>MATa ura3-52 Leu2 his3 ypt1A136D</i>                                                                               | (Liang <i>et al.</i> , 2007)     |
| YLY130            | GFP-Snc1                           | NSY128, <i>GFP-Snc1::URA3</i>                                                                                         |                                  |
| YLY132            | GFP-Snc1<br><i>ypt31Δ/32ts</i>     | NSY340, <i>GFP-Snc1::URA3</i>                                                                                         |                                  |
| YLY1770           | GFP-Snc1<br>TRS130                 | <i>MATa his3 lys2 leu2 TRS130-HA:HIS3MX6 GFP-Snc1::URA3</i>                                                           |                                  |
| YLY1771           | GFP-Snc1<br><i>trs130ts</i>        | <i>MATa his3 lys2 leu2 trs130-(33 aa truncation)-HA<sup>ts</sup>:HIS3MX6 GFP-Snc1::URA3</i>                           |                                  |
| YLY1664           | GFP-Snc1<br>YPT1                   | <i>MATa ade2 his3 leu2 lys2 GFP-Snc1::URA3</i>                                                                        |                                  |
| YLY1665           | GFP-Snc1<br><i>ypt1ts</i>          | <i>MATa ade2 his3 leu2 lys2 ypt1A136D GFP-Snc1::URA3</i>                                                              |                                  |
| YLY1347           | GFP-Snc1<br><i>trs85Δts</i>        | YLY130, <i>TRS85::Kan</i>                                                                                             |                                  |
| YLY1340           | GFP-Snc1<br><i>trs65Δ</i>          | YLY130, <i>TRS65::Hyg</i>                                                                                             |                                  |
| YLY1582           | GFP-Snc1-PEM                       | NSY128, <i>GFP-Snc1-PEM::URA3</i>                                                                                     |                                  |
| YLY1583           | GFP-Snc1-PEM<br><i>ypt31Δ/32ts</i> | NSY340, <i>GFP-Snc1-PEM::URA3</i>                                                                                     |                                  |
| YLY1584           | GFP-Snc1-PEM<br>TRS130             | NSY991, <i>GFP-Snc1-PEM::URA3</i>                                                                                     |                                  |
| YLY1585           | GFP-Snc1-PEM<br><i>trs130ts</i>    | NSY992, <i>GFP-Snc1-PEM::URA3</i>                                                                                     |                                  |
| YLY1612           | GFP-Snc1-PEM<br>YPT1               | NSY1081, <i>GFP-Snc1-PEM::URA3</i>                                                                                    |                                  |
| YLY1613           | GFP-Snc1-PEM<br><i>ypt1ts</i>      | NSY1082, <i>GFP-Snc1-PEM::URA3</i>                                                                                    |                                  |

|         |                               |                                                          |
|---------|-------------------------------|----------------------------------------------------------|
| YLY1651 | GFP-Snc1-PEM<br><i>trs85Δ</i> | YLY1582, <i>TRS85::Kan</i>                               |
| NSY915  | EJ758                         | <i>MATa his 3 delta leu200-3, 112 ura3-52 pep4::his3</i> |

## B. Plasmids

| Plasmid | Alias       | Genotype                                            | Source*                          |
|---------|-------------|-----------------------------------------------------|----------------------------------|
| pNS568  |             | pRS406 GS GFP-Snc1                                  | (Lewis <i>et al.</i> , 2000)     |
| pNS571  |             | pRS406 GSSOM GFP-Snc1-PEM                           | (Lewis <i>et al.</i> , 2000)     |
| pYL227  |             | Htb1-CFP NUF-3' UTR in pRS303                       | (Michelsen <i>et al.</i> , 2006) |
| pNS114  | pRB684      | 2μ, <i>LEU2</i>                                     | (Ma <i>et al.</i> , 1987)        |
| pNS993  |             | pRS11- <i>YPT1</i>                                  | (Liang <i>et al.</i> , 2007)     |
| pNS180  | pRS425      | 2μ, <i>LEU2</i>                                     | (Sikorski and Hieter, 1989)      |
| pNS781  |             | pRS425-Ypt31                                        | (Sciorra <i>et al.</i> , 2005)   |
| pYL151  | Yep351      | 2μ, <i>LEU2</i>                                     | (Yamamoto and Jigami, 2002)      |
| pYL283  |             | Yep351-Ypt32                                        |                                  |
| pNS563  | pRS426      | 2 μ, <i>URA3</i>                                    | (Sikorski and Hieter, 1989)      |
| pNS1404 | 2μ GFP-Snc1 | pNS563 with TPIp GFP-Snc1 (BamHI-PspXI from pNS568) |                                  |

\*All strains and plasmids, if not marked otherwise, were constructed in this study.
